# Supplementary material for: The Electronic Effects of 3-Methoxycarbonylcoumarin Substituents on Spectral, Antioxidant, and Protein Binding Properties
Source: MDPI journal article supplement (doi:10.3390/ijms241411820), 2023-07-23
Supplement: s1 [file s1]

Supplementary information for:

## The Electronic Effects of 3-Methoxycarbonylcoumarin Substituents on Spectral, Antioxidant, and Protein Binding Properties

Jelena Vasić <sup>1</sup>, Dušan Dimić <sup>1,\*</sup>, Marko Antonijević <sup>2</sup>, Edina H. Avdović <sup>2</sup>, Dejan Milenković <sup>2</sup>,  
Đura Nakarada <sup>1</sup>, Jasmina Dimitrić Marković <sup>1</sup>, Maja Molnar <sup>3</sup>, Melita Lončarić <sup>3</sup>,  
Drago Bešlo <sup>4,\*</sup> and Zoran Marković <sup>2</sup>

1 Faculty of Physical Chemistry, University of Belgrade, Studentski trg 12-16,  
11000 Belgrade, Serbia

2 Institute for Information Technologies, Kragujevac, University of Kragujevac, Jovana Cvijica  
bb, 34000 Kragujevac, Serbia

3 Department of Applied Chemistry and Ecology, Faculty of Food Technology Osijek, Josip  
Juraj Strossmayer University of Osijek, Franje Kuhača 18, 31000 Osijek, Croatia;  
melita2608@gmail.com (M.L.)

4 Department of Agroecology and Environmental Protection, Faculty of Agrobiotechnical  
Sciences Osijek, Josip Juraj Strossmayer University of Osijek, Vladimir Prelog 1, 31000  
Osijek, Croatia

\* Correspondence: dbeslo@fazos.hr (D.B.); ddimic@ffh.bg.ac.rs (D.D.)

Table S1. Experimental and theoretical (various functionals with 6-311++G(d,p) level of theory) bond lengths of coumarin-3-carboxylic acid

| 3-carboxylic acid coumarin | experimental | APFD  | B3LYP-D3BJ | M06-2X |
|----------------------------|--------------|-------|------------|--------|
| O1-C                       | 1.368        | 1.351 | 1.358      | 1.353  |
| O1-C12                     | 1.375        | 1.385 | 1.390      | 1.376  |
| C6-C8                      | 1.476        | 1.484 | 1.487      | 1.492  |
| C8-O5                      | 1.216        | 1.200 | 1.202      | 1.194  |
| C8-O2                      | 1.315        | 1.350 | 1.358      | 1.347  |
| C6-C10                     | 1.332        | 1.346 | 1.347      | 1.340  |
| C10-C9                     | 1.442        | 1.436 | 1.439      | 1.446  |
| C9-C7                      | 1.381        | 1.407 | 1.410      | 1.402  |
| C7-C12                     | 1.458        | 1.471 | 1.472      | 1.478  |
| C9-C15                     | 1.399        | 1.402 | 1.405      | 1.401  |
| C15-C19                    | 1.377        | 1.384 | 1.386      | 1.384  |
| C19-C17                    | 1.379        | 1.400 | 1.401      | 1.399  |
| C17-C13                    | 1.371        | 1.385 | 1.386      | 1.384  |
| C13-C7                     | 1.406        | 1.395 | 1.398      | 1.395  |
| C12-O4                     | 1.211        | 1.198 | 1.200      | 1.193  |
| R                          |              | 0.982 | 0.981      | 0.981  |
| MAE [ $\text{\AA}$ ]       |              | 0.014 | 0.015      | 0.014  |

Table S2. Experimental and theoretical (various functionals with 6-311++G(d,p) level of theory) bond lengths of 3-acetylcoumarin

| 3-acetylcoumarin | Experimental | APFD  | B3LYP-D3BJ | M06-2X |
|------------------|--------------|-------|------------|--------|
| O1-C7            | 1.385        | 1.393 | 1.400      | 1.380  |
| C7-O3            | 1.211        | 1.200 | 1.202      | 1.196  |
| C7-C8            | 1.472        | 1.466 | 1.466      | 1.472  |
| C8-C10           | 1.510        | 1.504 | 1.510      | 1.512  |
| C8-C9            | 1.360        | 1.359 | 1.361      | 1.352  |
| C10-O5           | 1.224        | 1.214 | 1.218      | 1.209  |
| C10-C14          | 1.505        | 1.500 | 1.505      | 1.503  |
| C9-C4            | 1.434        | 1.424 | 1.426      | 1.434  |
| C4-C6            | 1.403        | 1.404 | 1.405      | 1.398  |
| C6-O1            | 1.380        | 1.351 | 1.358      | 1.355  |
| C4-C13           | 1.411        | 1.405 | 1.408      | 1.404  |
| C13-C12          | 1.389        | 1.381 | 1.382      | 1.381  |
| C12-C11          | 1.403        | 1.401 | 1.403      | 1.401  |
| C11-C2           | 1.391        | 1.386 | 1.388      | 1.384  |
| C2-C6            | 1.390        | 1.391 | 1.393      | 1.392  |
| R                |              | 0.996 | 0.996      | 0.998  |

|                      |       |       |       |
|----------------------|-------|-------|-------|
| MAE [ $\text{\AA}$ ] | 0.007 | 0.006 | 0.007 |
|----------------------|-------|-------|-------|

Table S3. Experimental and theoretical (various functionals with 6-311++G(d,p) level of theory) bond angles of coumarin-3-carboxylic acid coumarin

| 3-carboxylic acid coumarin | Experimental | APFD   | B3LYP-D3BJ | M06-2X |
|----------------------------|--------------|--------|------------|--------|
| O1-C6-C8                   | 110.42       | 111.72 | 112.02     | 111.71 |
| O1-C6-C10                  | 122.91       | 123.50 | 123.17     | 123.87 |
| C6-C8-O5                   | 121.97       | 124.54 | 125.08     | 124.73 |
| C6-C8-O2                   | 113.37       | 111.45 | 111.47     | 111.42 |
| C10-C6-C8                  | 126.66       | 124.78 | 124.81     | 124.43 |
| C6-C10-C9                  | 119.74       | 119.31 | 119.54     | 119.05 |
| C10-C9-C7                  | 118.08       | 118.22 | 118.23     | 118.04 |
| C10-C9-C15                 | 122.23       | 122.75 | 122.73     | 122.85 |
| C9-C15-C19                 | 120.25       | 120.05 | 120.14     | 119.97 |
| C9-C7-C13                  | 120.14       | 120.59 | 120.39     | 120.69 |
| C9-C7-C12                  | 120.78       | 120.51 | 120.60     | 120.62 |
| C15-C19-C17                | 119.30       | 120.55 | 120.50     | 120.56 |
| C19-C17-C13                | 122.01       | 120.06 | 120.08     | 120.04 |
| C17-C13-C7                 | 118.61       | 119.72 | 119.85     | 119.62 |
| C13-C7-C12                 | 119.08       | 118.89 | 119.01     | 118.70 |
| C7-C12-O1                  | 117.16       | 116.21 | 116.08     | 116.22 |
| C7-C12-O4                  | 126.66       | 125.56 | 125.97     | 125.38 |
| O4-C12-O1                  | 116.18       | 118.23 | 117.95     | 118.41 |
| R                          |              | 0.945  | 0.943      | 0.936  |
| MAE [ $^{\circ}$ ]         |              | 1.05   | 1.00       | 1.14   |

Table S4. Experimental and theoretical (various functionals with 6-311++G(d,p) level of theory) bond angles of 3-acetylcoumarin

| 3-acetylcoumarin | Experimental | APFD   | B3LYP-D3BJ | M06-2X |
|------------------|--------------|--------|------------|--------|
| O1-C7-O3         | 115.63       | 116.64 | 116.44     | 117.07 |
| C1-C7-C8         | 116.60       | 116.12 | 115.95     | 116.17 |
| O3-C7-C8         | 127.77       | 127.24 | 127.61     | 126.77 |
| C7-C8-C9         | 119.92       | 119.80 | 119.88     | 119.92 |
| C7-C8-C10        | 121.77       | 122.53 | 122.43     | 122.17 |
| C8-C10-O5        | 118.79       | 118.57 | 118.58     | 118.37 |
| C8-C10-C14       | 119.92       | 120.10 | 120.18     | 120.10 |
| O5-C10-C14       | 121.29       | 121.33 | 121.25     | 121.53 |

|             |        |        |        |        |
|-------------|--------|--------|--------|--------|
| C8-C9-C4    | 121.94 | 122.22 | 122.32 | 121.90 |
| C9-C4-C6    | 117.51 | 117.17 | 117.33 | 117.20 |
| C9-C4-C13   | 123.76 | 123.93 | 123.91 | 123.91 |
| C4-C6-O1    | 120.80 | 121.16 | 120.83 | 121.09 |
| C4-C6-C2    | 122.23 | 121.19 | 121.28 | 121.34 |
| C4-C13-C12  | 119.69 | 120.27 | 120.31 | 120.26 |
| C13-C12-C11 | 120.03 | 119.77 | 119.81 | 119.76 |
| C12-C11-C2  | 121.38 | 121.12 | 121.05 | 121.05 |
| C11-C2-C6   | 117.94 | 118.76 | 118.78 | 118.69 |
| C2-C6-O1    | 116.97 | 117.65 | 117.89 | 117.58 |
| C6-O1-C7    | 123.00 | 123.52 | 123.70 | 123.73 |
| R           |        | 0.982  | 0.983  | 0.979  |
| MAE [°]     |        | 0.46   | 0.43   | 0.48   |

Table S5. Optimized bond lengths (in Å) of coumarin derivatives (at B3LYP-D3BJ/6-311++G(d,p) level of theory)

|        | <b>6-Br</b> | <b>6-NO2</b> | <b>6-OH</b> | <b>6-OCH3</b> |
|--------|-------------|--------------|-------------|---------------|
| C3-C4  | 1.360       | 1.358        | 1.362       | 1.363         |
| C3-C2  | 1.465       | 1.464        | 1.464       | 1.463         |
| C3-C1' | 1.493       | 1.495        | 1.492       | 1.492         |
| C1'=O  | 1.215       | 1.214        | 1.216       | 1.216         |
| C1'-O  | 1.332       | 1.330        | 1.333       | 1.333         |
| O-C2'  | 1.446       | 1.446        | 1.445       | 1.445         |
| C2=O   | 1.206       | 1.202        | 1.208       | 1.208         |
| C2-O   | 1.392       | 1.401        | 1.386       | 1.388         |
| O-C9   | 1.361       | 1.352        | 1.366       | 1.365         |
| C9-C10 | 1.402       | 1.406        | 1.401       | 1.399         |
| C9-C8  | 1.392       | 1.395        | 1.392       | 1.394         |
| C10-C4 | 1.427       | 1.429        | 1.426       | 1.425         |
| C7-C8  | 1.387       | 1.382        | 1.385       | 1.382         |
| C7-C6  | 1.401       | 1.401        | 1.406       | 1.411         |
| C6-C5  | 1.380       | 1.382        | 1.384       | 1.386         |
| C5-C10 | 1.407       | 1.400        | 1.408       | 1.411         |
| C6-Br  | 1.915       |              |             |               |
| C6-N   |             | 1.466        |             |               |
| N-O    |             | 1.227        |             |               |
| N-O    |             | 1.227        |             |               |
| C6-O   |             |              | 1.365       |               |
| C6-O   |             |              |             | 1.359         |
| O-Me   |             |              |             | 1.430         |
| MAE    | /           | 0.003        | 0.002       | 0.003         |

Table S6. Optimized bond angles (in °) of coumarin derivatives (at B3LYP-D3BJ/6-311++G(d,p) level of theory)

|            | <b>6-Br</b> | <b>6-NO2</b> | <b>6-OH</b> | <b>6-OCH3</b> |
|------------|-------------|--------------|-------------|---------------|
| C4-C3-C1'  | 117.1       | 117.2        | 117.1       | 117.0         |
| C10-C4-C3  | 121.9       | 121.8        | 122.0       | 122.1         |
| C3-C1'=O   | 122.5       | 122.3        | 122.6       | 122.6         |
| O=C1'-O    | 123.8       | 124.0        | 123.6       | 123.5         |
| C3-C1'-O17 | 113.7       | 113.6        | 113.7       | 113.8         |
| C1'-O-C2'  | 116.2       | 116.3        | 116.3       | 116.2         |
| C4-C3-C2   | 120.3       | 120.3        | 120.3       | 120.3         |
| C3-C2=O    | 128.2       | 128.5        | 128.0       | 128.2         |
| C3-C2-O    | 115.7       | 115.6        | 115.7       | 115.6         |
| C2-O-C9    | 124.0       | 124.0        | 123.9       | 123.9         |
| O=C2-O     | 116.1       | 115.9        | 116.3       | 116.2         |
| O-C9-C10   | 120.6       | 120.6        | 120.8       | 120.9         |
| O-C9-C8    | 118.0       | 117.8        | 118.1       | 118.1         |
| C9-C10-C4  | 117.5       | 117.6        | 117.2       | 117.1         |
| C9-C8-C7   | 119.0       | 118.9        | 119.0       | 118.9         |
| C8-C9-C10  | 121.4       | 121.7        | 121.1       | 121.0         |
| C8-C7-C6   | 120.0       | 119.5        | 120.8       | 121.2         |
| C7-C6-C5   | 121.4       | 122.2        | 120.1       | 119.8         |
| C6-C5-C10  | 119.1       | 118.7        | 119.7       | 119.5         |
| C5-C10-C4  | 123.3       | 123.4        | 123.4       | 123.2         |
| C7-C6-Br   | 119.0       |              |             |               |
| C5-C7-Br   | 119.6       |              |             |               |
| C7-C6-N    |             | 118.9        |             |               |
| C5-C6-N    |             | 118.9        |             |               |
| C6-N-O     |             | 118.1        |             |               |
| C6-N-O     |             | 118.0        |             |               |
| O-N-O      |             | 123.9        |             |               |
| C7-C6-O    |             |              | 116.6       |               |
| C5-C6-O    |             |              | 123.3       |               |
| C7-C6-O    |             |              |             | 115.4         |
| C5-C7-O    |             |              |             | 124.8         |
| C7-O-Me    |             |              |             | 118.0         |
| MAE        | /           | 0.2          | 0.2         | 0.3           |

Table S7. Energies (in kJ mol<sup>-1</sup>) of the second order perturbation theory stabilization interactions (at B3LYP-D3BJ/6-311++G(d,p) level of theory)

| Type of interaction                                    | <b>6-Br</b> | <b>6-NO2</b> | <b>6-OH</b> | <b>6-OCH3</b> |
|--------------------------------------------------------|-------------|--------------|-------------|---------------|
| $\pi(\text{C3-C4}) \rightarrow \pi(\text{C2-O})$       | 109         | 107          | 108         | 97            |
| $\pi(\text{C3-C4}) \rightarrow \sigma(\text{C1'-O16})$ | 45          | 53           | 45          | /             |
| $\pi(\text{C3-C4}) \rightarrow \pi(\text{C1'-O})$      | 83          | 80           | 84          | /             |
| $\pi(\text{C5-C10}) \rightarrow \sigma(\text{C6-Br})$  | 23          | /            | /           | /             |
| $\pi(\text{C5-C10}) \rightarrow \sigma(\text{C6-N})$   | /           | 17           | /           | /             |
| $\pi(\text{C5-C10}) \rightarrow \sigma(\text{C6-O})$   | /           | /            | 15          | /             |
| $\pi(\text{C5-C10}) \rightarrow \sigma(\text{C6-O})$   | /           | /            | /           | 21            |
| $\pi(\text{C9-C10}) \rightarrow \pi(\text{C3-C4})$     | 85-150      | 87-113       | 55-100      | 80-120        |
| $\sigma(\text{C6-Br}) \rightarrow \pi(\text{C5-C10})$  | 13          | /            | /           | /             |
| $\sigma(\text{C6-Br}) \rightarrow \pi(\text{C7-C8})$   | 12          | /            | /           | /             |
| $\sigma(\text{C6-N}) \rightarrow \pi(\text{C5-C10})$   | /           | 5            | /           | /             |
| $\sigma(\text{C6-N}) \rightarrow \pi(\text{C7-C8})$    | /           | 5            | /           | /             |
| $\sigma(\text{C6-O}) \rightarrow \pi(\text{C5-C10})$   | /           | /            | 23          | /             |
| $\sigma(\text{C6-N}) \rightarrow \pi(\text{C5-C10})$   | /           | /            | 42          | /             |
| $\text{LP}(\text{O}) \rightarrow \pi(\text{C2-O})$     | 147         | 139          | 152         | 137           |
| $\text{LP}(\text{O}) \rightarrow \pi(\text{C9-C10})$   | 124         | 129          | 116         | 67            |
| $\text{LP}(\text{O}) \rightarrow \pi(\text{C2-O})$     | 70          | 70           | 68          | 69            |
| $\text{LP}(\text{O}) \rightarrow \pi(\text{C2-O})$     | 150         | 156          | 146         | 146           |
| $\text{LP}(\text{O}) \rightarrow \pi(\text{C1'-O})$    | 124         | 124          | 124         | 123           |
| $\text{LP}(\text{O}) \rightarrow \pi(\text{C3-C1'})$   | 75          | 76           | 74          | 75            |
| $\text{LP}(\text{Br}) \rightarrow \pi(\text{C5-C6})$   | 40          | /            | /           | /             |
| $\text{LP}(\text{Br}) \rightarrow \pi(\text{C6-C7})$   | 14          | /            | /           | /             |
| $\text{LP}(\text{O}) \rightarrow \pi(\text{N-O})$      | /           | 540          | /           | /             |
| $\text{LP}(\text{O}) \rightarrow \pi(\text{C5-C6})$    | /           | /            | 100         | /             |
| $\text{LP}(\text{O}) \rightarrow \pi(\text{C6-C7})$    | /           | /            | 5           | /             |
| $\text{LP}(\text{O}) \rightarrow \pi(\text{C6-C7})$    | /           | /            | /           | 23            |

Table S8. AIM parameters (electron density/Laplacian) for the selected bonds (at B3LYP-D3BJ/6-311++G(d,p) level of theory)

| Bond  | <b>6-Br</b>    | <b>6-NO2</b>   | <b>6-OH</b>    | <b>6-OMe</b>   |
|-------|----------------|----------------|----------------|----------------|
| C2–C3 | 0.2578/-0.7068 | 0.2759/-0.7086 | 0.2760/-0.7070 | 0.2764/-0.7084 |
| C2=O  | 0.4199/-0.2263 | 0.4230/-0.1981 | 0.4173/-0.2473 | 0.4173/-0.2484 |
| C2–O  | 0.2662/-0.4372 | 0.2611/-0.4438 | 0.2695/-0.4283 | 0.2687/-0.4286 |
| C9–O  | 0.2801/-0.2302 | 0.2867/-0.2399 | 0.2758/-0.2127 | 0.2763/-0.2112 |
| C8–C9 | 0.3133/-0.8952 | 0.3118/-0.8904 | 0.3128/-0.8906 | 0.3112/-0.8872 |

|                        |                |                |                |                |
|------------------------|----------------|----------------|----------------|----------------|
| C7–C8                  | 0.3109/-0.8685 | 0.3145/-0.8891 | 0.3122/-0.8741 | 0.3138/-0.8820 |
| C7–C6                  | 0.3049/-0.8401 | 0.3061/-0.8531 | 0.3064/-0.8598 | 0.3040/-0.8482 |
| C6–Br                  | 0.1561/-0.1435 | /              | /              | /              |
| C6–N                   | /              | 0.2591/-0.6619 | /              | /              |
| N–O                    | /              | 0.4964/-1.0404 | /              | /              |
| C6–O                   | /              | /              | 0.2849/-0.3920 | /              |
| C6–O(CH <sub>3</sub> ) | /              | /              | /              | 0.2886/-0.3871 |
| C6–C5                  | 0.3164/-0.8923 | 0.3167/-0.9020 | 0.3162/-0.8940 |                |
| C5–C10                 | 0.2999/-0.8161 | 0.3049/-0.8434 | 0.2988/-0.8081 | 0.3143/-0.8814 |
| C9–C10                 | 0.3092/-0.8708 | 0.3076/-0.8647 | 0.3096/-0.8704 | 0.3106/-0.8757 |
| C4–C10                 | 0.2926/-0.7994 | 0.2918/-0.7969 | 0.2931/-0.8018 | 0.2938/-0.8049 |
| C3–C4                  | 0.3292/-0.9568 | 0.3307/-0.9646 | 0.3281/-0.9507 | 0.3276/-0.9482 |
| C3–C1'                 | 0.2636/-0.6562 | 0.2629/-0.6533 | 0.2642/-0.6591 | 0.2643/-0.6587 |
| C1'=O                  | 0.4101/-0.2406 | 0.4109/-0.2350 | 0.4096/-0.2433 | 0.4094/-0.2460 |
| C1'–O                  | 0.3126/-0.4764 | 0.3136/-0.4761 | 0.3117/-0.4767 | 0.3116/-0.4769 |
| C2'–O                  | 0.2295/-0.2622 | 0.2288/-0.2562 | 0.2299/-0.2658 | 0.2301/-0.2674 |

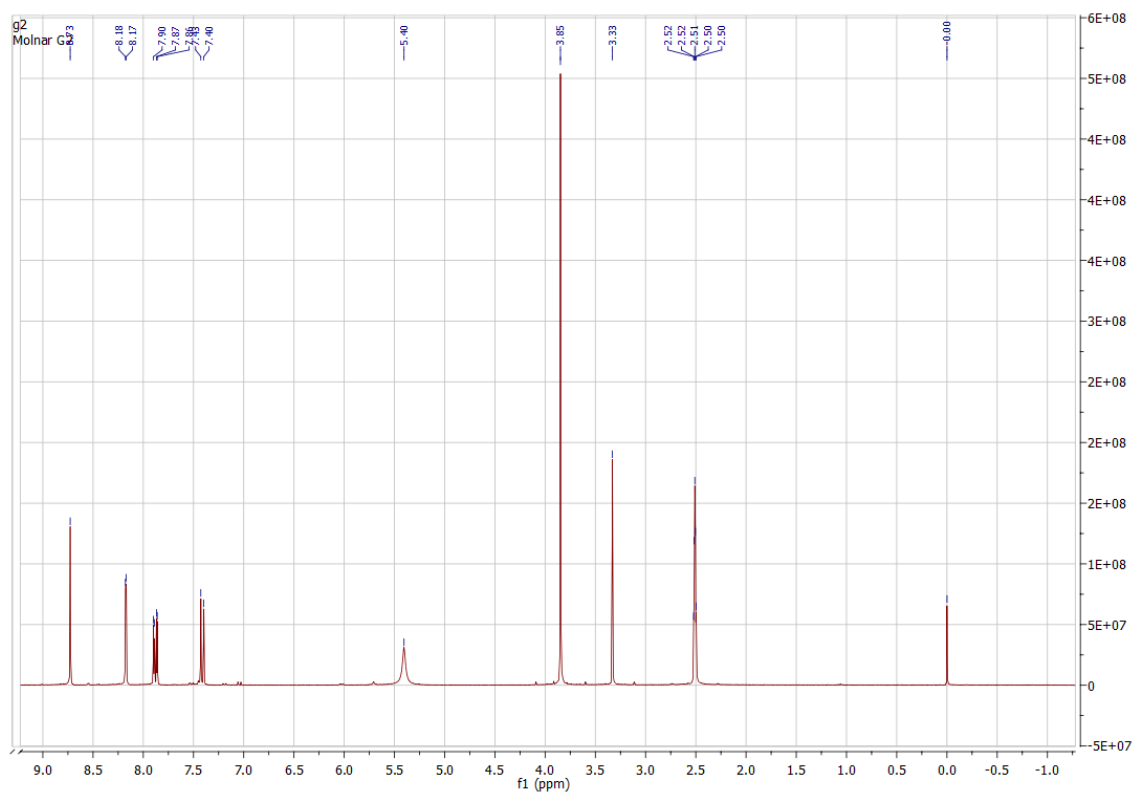

Figure S1. <sup>1</sup>H NMR spectrum of **6-Br**.

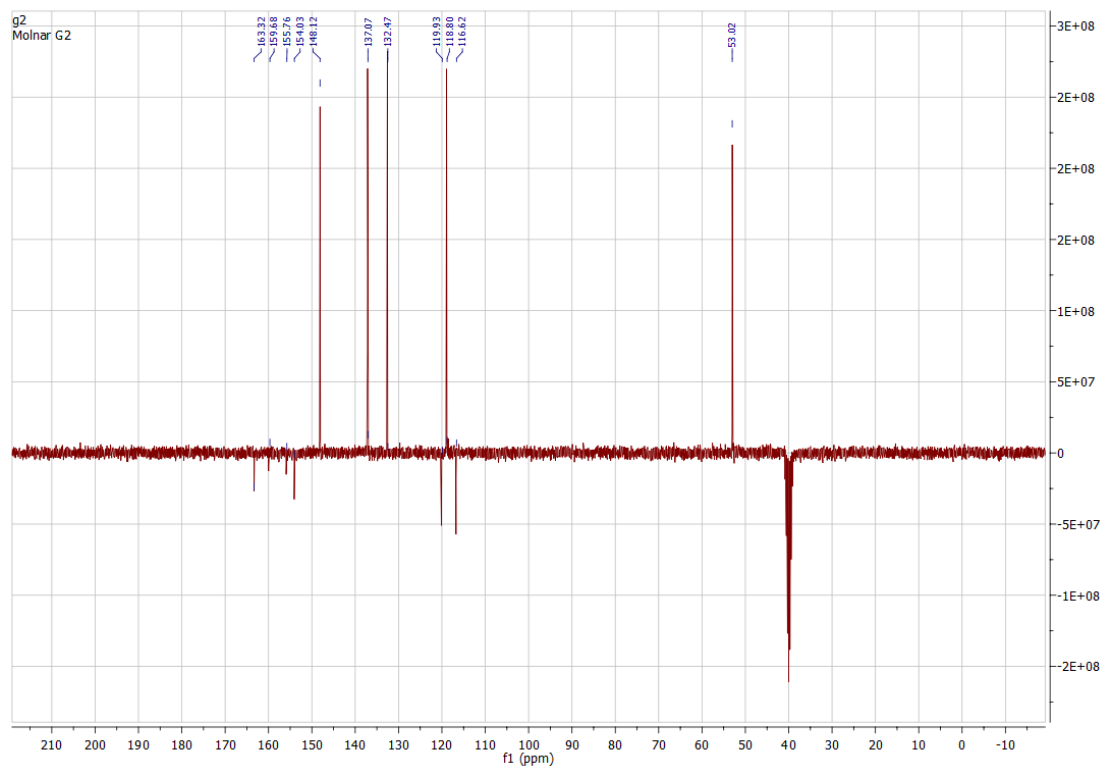

Figure S2. <sup>13</sup>C NMR spectrum of **6-Br**.



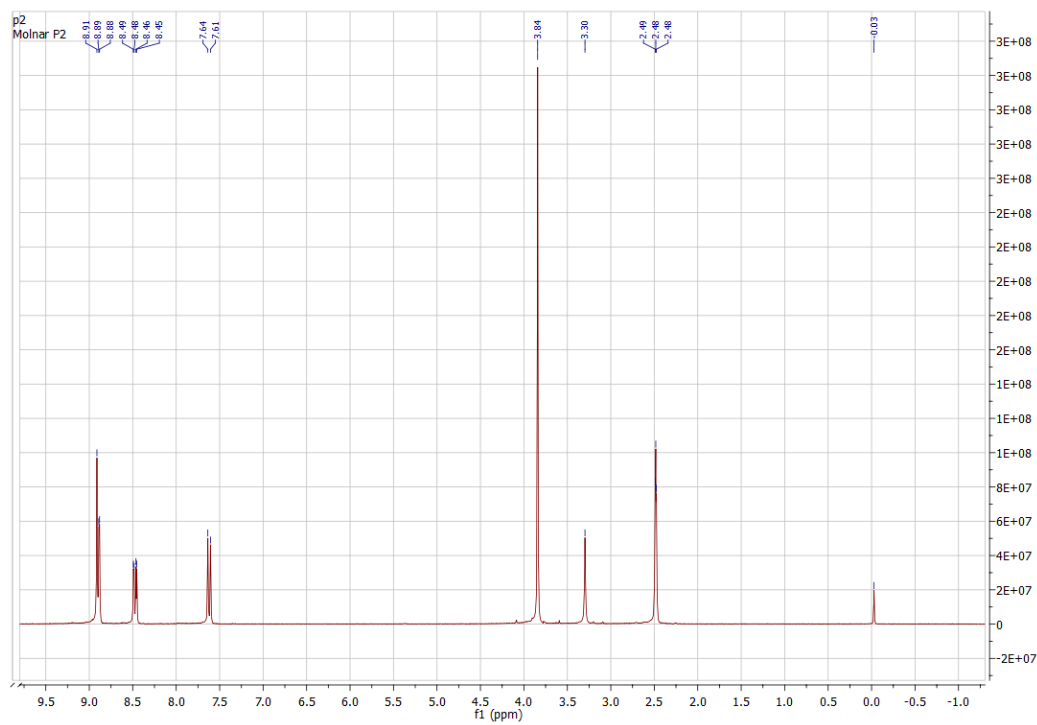

Figure S3.  $^1\text{H}$  NMR spectrum of **6-NO<sub>2</sub>**.

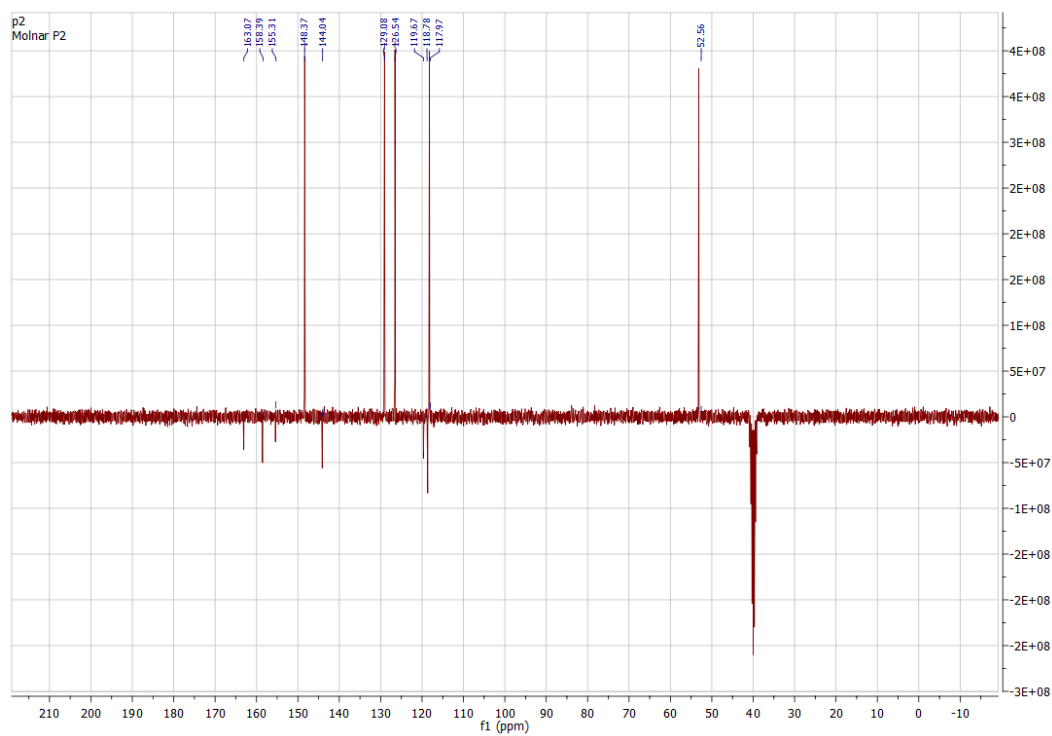

Figure S4.  $^{13}\text{C}$  NMR spectrum of **6-NO<sub>2</sub>**.

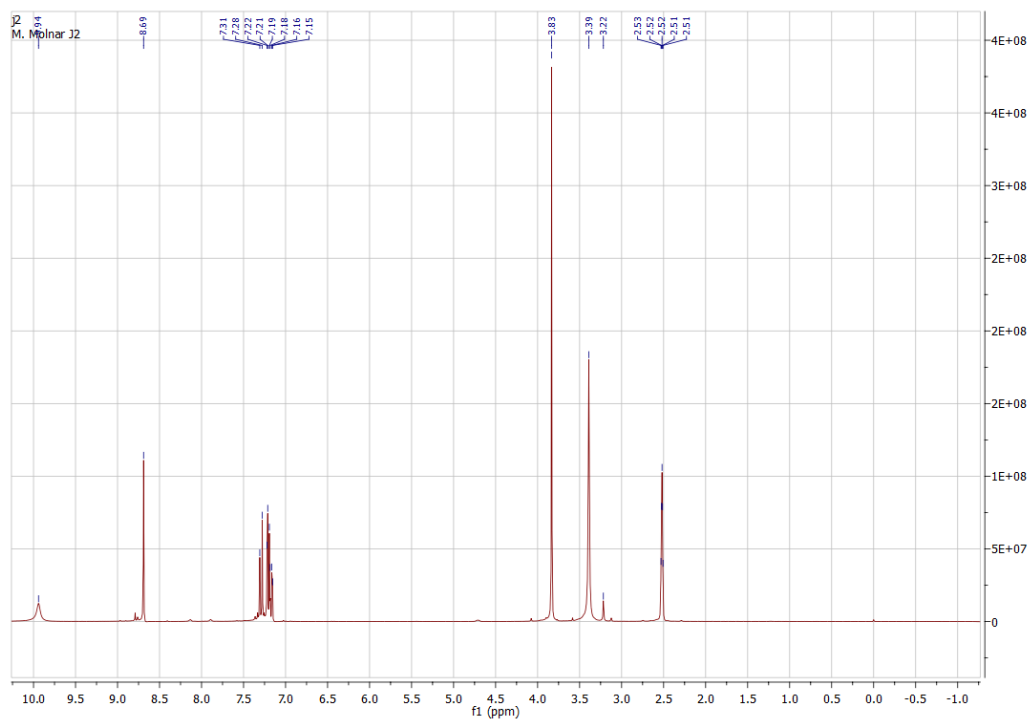

Figure S5. <sup>1</sup>H NMR spectrum of 6-OH.

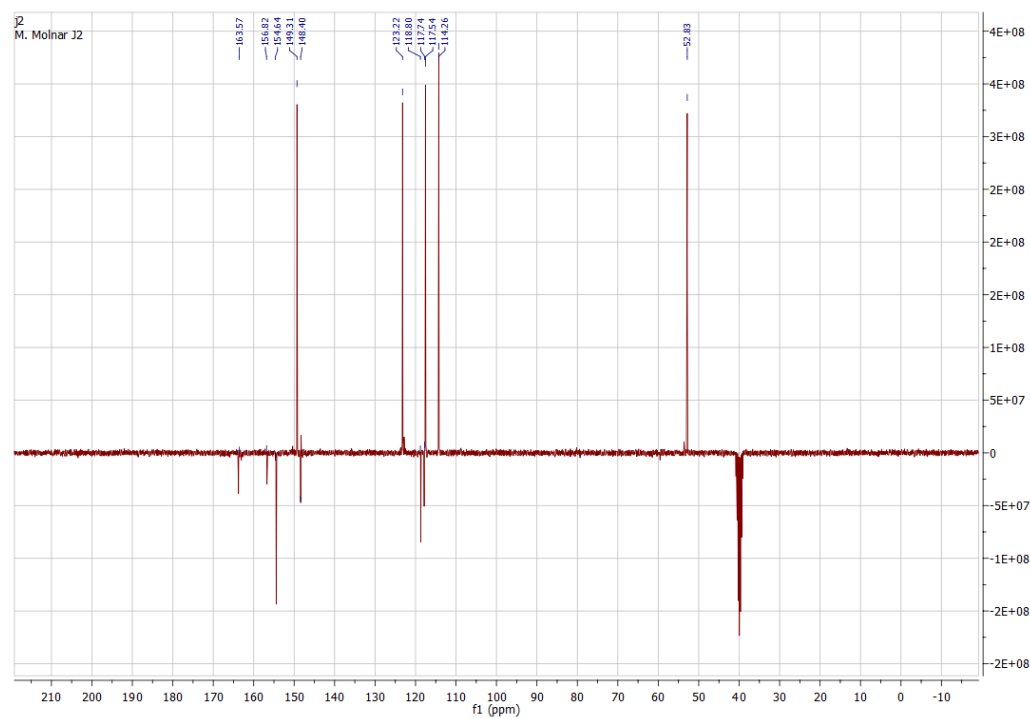

Figure S6. <sup>13</sup>C NMR spectrum of 6-OH.

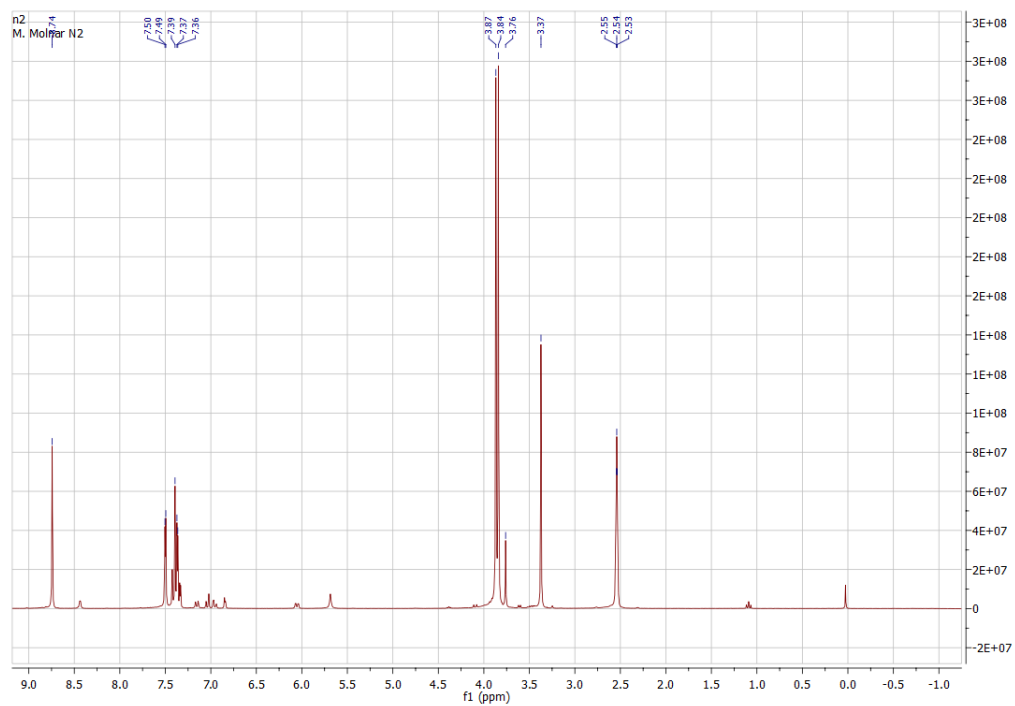

Figure S7. <sup>1</sup>H NMR spectrum of 6-OMe.

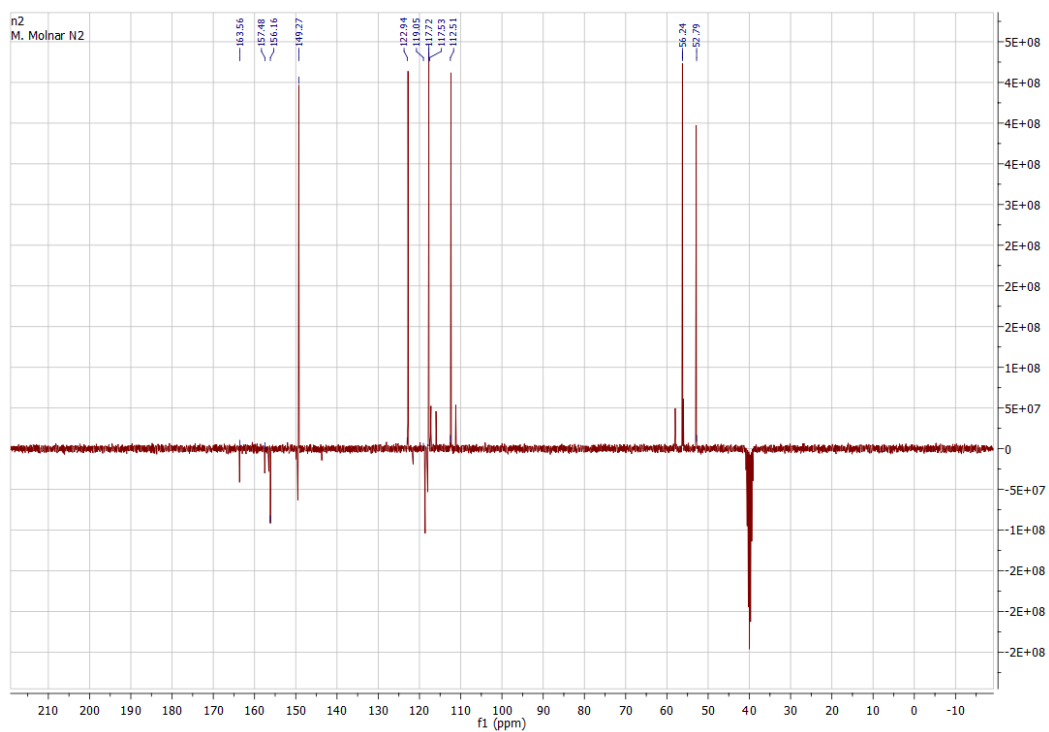

Figure S8. <sup>13</sup>C NMR spectrum of 6-OMe.

Table S9. Experimental and theoretical (at B3LYP-D3BJ/6-311++G(d,p))  $^1\text{H}$  and  $^{13}\text{C}$  chemical shifts of **6-NO<sub>2</sub>**

| $^1\text{H}$ chemical shifts [ppm] |              |             | $^{13}\text{C}$ chemical shifts [ppm] |              |             |
|------------------------------------|--------------|-------------|---------------------------------------|--------------|-------------|
| H atom                             | Experimental | Theoretical | C atom                                | Experimental | Theoretical |
| C2'-H (3)                          | 3.94         | 3.80        | C2'                                   | 53           | 55          |
| C8-H                               | 7.58         | 7.61        | C3                                    | 118          | 119         |
| C7-H                               | 8.86         | 8.89        | C8                                    | 119          | 119         |
| C5-H                               | 8.79         | 8.48        | C10                                   | 120          | 119         |
| C4-H                               | 8.86         | 8.91        | C5                                    | 127          | 129         |
| R                                  |              | 0.999       | C6                                    | 129          | 132         |
| MAE [ppm]                          |              | 0.14        | C7                                    | 144          | 145         |
|                                    |              |             | C4                                    | 148          | 153         |
|                                    |              |             | C2                                    | 155          | 156         |
|                                    |              |             | C9                                    | 158          | 162         |
|                                    |              |             | C1'                                   | 163          | 166         |
|                                    |              |             | R                                     |              | 0.995       |
|                                    |              |             | MAE [ppm]                             |              | 2           |

Table S10. Experimental and theoretical (at B3LYP-D3BJ/6-311++G(d,p))  $^1\text{H}$  and  $^{13}\text{C}$  chemical shifts of **6-OH**

| $^1\text{H}$ chemical shifts [ppm] |              |             | $^{13}\text{C}$ chemical shifts [ppm] |              |             |
|------------------------------------|--------------|-------------|---------------------------------------|--------------|-------------|
| H atom                             | Experimental | Theoretical | C atom                                | Experimental | Theoretical |
| C2'-H (3)                          | 3.82         | 3.83        | C2'                                   | 53           | 55          |
| C8-H                               | 7.45         | 7.22        | C3                                    | 114          | 113         |
| C7-H                               | 7.52         | 7.30        | C8                                    | 118          | 118         |
| C5-H                               | 7.05         | 7.15        | C10                                   | 118          | 119         |
| C4-H                               | 8.79         | 8.69        | C5                                    | 119          | 120         |
| R                                  |              | 0.999       | C6                                    | 132          | 125         |
| MAE [ppm]                          |              | 0.13        | C7                                    | 148          | 153         |
|                                    |              |             | C4                                    | 149          | 153         |
|                                    |              |             | C2                                    | 154          | 155         |
|                                    |              |             | C9                                    | 157          | 158         |
|                                    |              |             | C2'                                   | 164          | 167         |
|                                    |              |             | R                                     |              | 0.996       |
|                                    |              |             | MAE [ppm]                             |              | 2           |

Table S11. Experimental and theoretical (at B3LYP-D3BJ/6-311++G(d,p))  $^1\text{H}$  and  $^{13}\text{C}$  chemical shifts of **6-OMe**

| $^1\text{H}$ chemical shifts [ppm] |              |             | $^{13}\text{C}$ chemical shifts [ppm] |              |             |
|------------------------------------|--------------|-------------|---------------------------------------|--------------|-------------|
| H atom                             | Experimental | Theoretical | C atom                                | Experimental | Theoretical |
| C2'-H (3)                          | 3.84         | 3.85        | C2'                                   | 53           | 55          |
| OCH <sub>3</sub>                   | 3.76         | 3.84        | C3                                    | 56           | 56          |
| C8-H                               | 7.40         | 7.50        | C8                                    | 113          | 108         |
| C7-H                               | 7.50         | 7.68        | C10                                   | 118          | 117         |
| C5-H                               | 7.00         | 6.90        | C5                                    | 118          | 119         |
| C4-H                               | 8.74         | 8.87        | C6                                    | 119          | 120         |
| R                                  |              | 0.999       | C7                                    | 123          | 129         |
| MAE [ppm]                          |              | 0.10        | C4                                    | 149          | 153         |
|                                    |              |             | C2                                    | 149          | 153         |
|                                    |              |             | C9                                    | 156          | 158         |
|                                    |              |             | C1'                                   | 157          | 158         |
|                                    |              |             | OCH <sub>3</sub>                      | 164          | 167         |
|                                    |              |             | R                                     |              | 0.997       |
|                                    |              |             | MAE [ppm]                             |              | 2           |

Table S12. Experimental and theoretical electronic transitions of investigated coumarin derivatives

| Compound                | Experimental wavelength [nm] | Calculated wavelength [nm] | Transition with the probability        | Oscillatory strenght |
|-------------------------|------------------------------|----------------------------|----------------------------------------|----------------------|
| <b>6-Br</b>             | 347                          | 351                        | HOMO→LUMO (96%)                        | 0.1344               |
|                         | 291                          | 298                        | HOMO-1→LUMO (85%)                      | 0.4008               |
|                         | 228                          | 230                        | HOMO→LUMO+1 (38%)<br>HOMO→LUMO+2(45%)  | 0.4658               |
| <b>6-NO<sub>2</sub></b> | 331                          | 333                        | HOMO→LUMO (81%)                        | 0.1687               |
|                         | 271                          | 300                        | HOMO→LUMO+1 (88%)                      | 0.3629               |
|                         |                              | 287                        | HOMO-1→LUMO (40%)<br>HOMO-2→LUMO (49%) | 0.1250               |
|                         |                              | 280                        | HOMO-3→LUMO (33%)                      | 0.1878               |
|                         |                              | 275                        | HOMO-3→LUMO (50%)                      | 0.1325               |
| <b>6-OH</b>             | 300                          | 301                        | HOMO→LUMO (97%)                        | 0.1269               |

|               |     |     |                        |        |
|---------------|-----|-----|------------------------|--------|
|               | 368 | 377 | HOMO-1→LUMO<br>(92%)   | 0.3989 |
| <b>6-OCH3</b> | 365 | 385 | HOMO→LUMO (98%)        | 0.1301 |
|               | 296 | 301 | HOMO-1→LUMO<br>(93%)   | 0.4093 |
|               | 229 | 239 | HOMO→LUMO+1<br>(63%)   | 0.2813 |
|               | 202 | 212 | HOMO-1→LUMO+1<br>(51%) | 0.3896 |

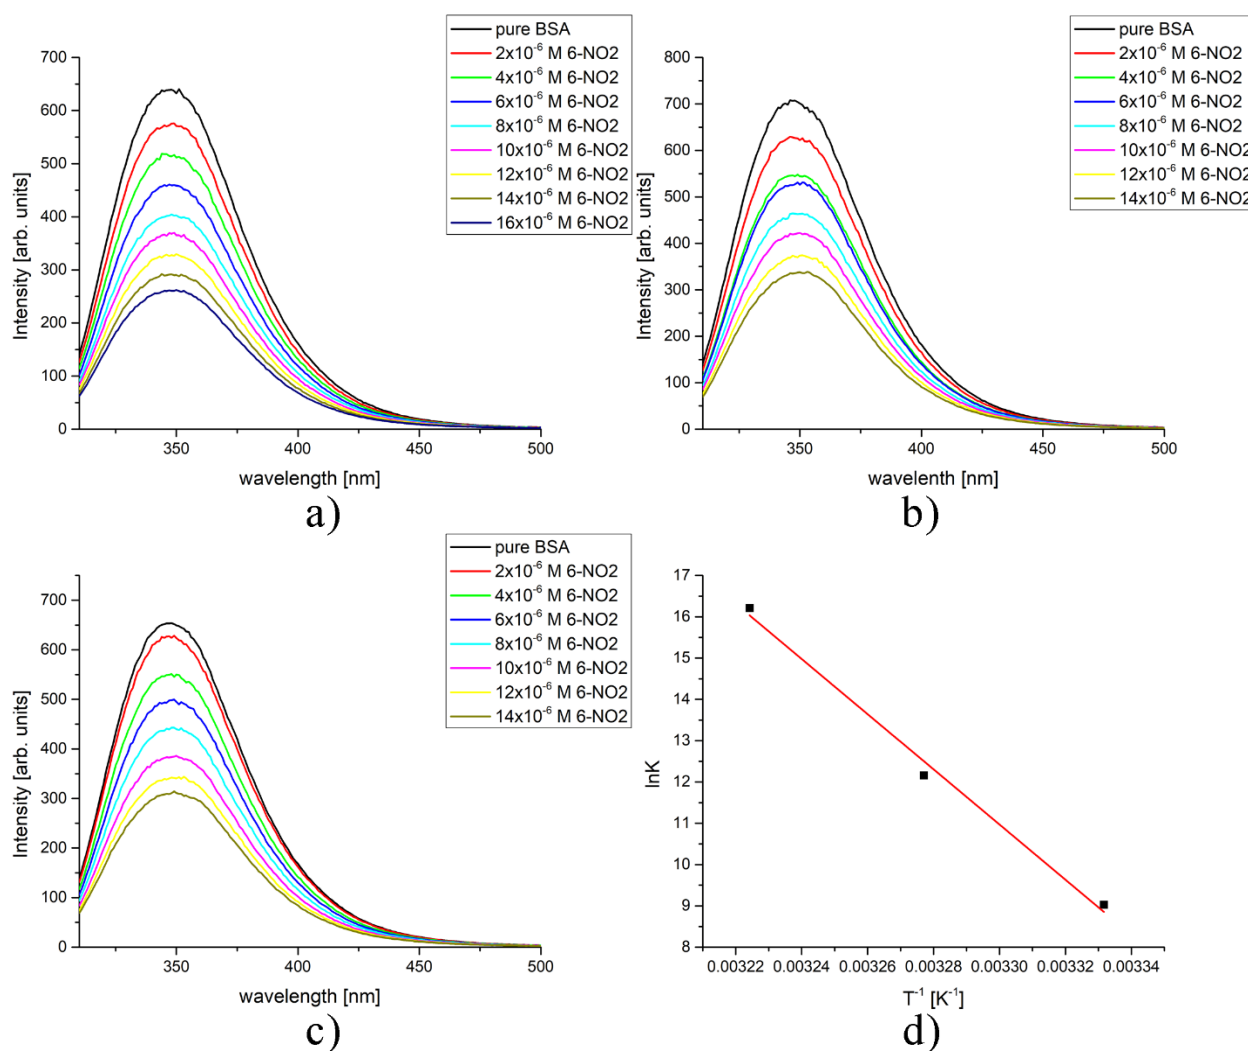

Figure S9. The BSA-binding fluorescence curves for **6-NO2** at a) 27°C, b) 32°C, and c) 37°C, and d) Van't Hoff's plot for binding

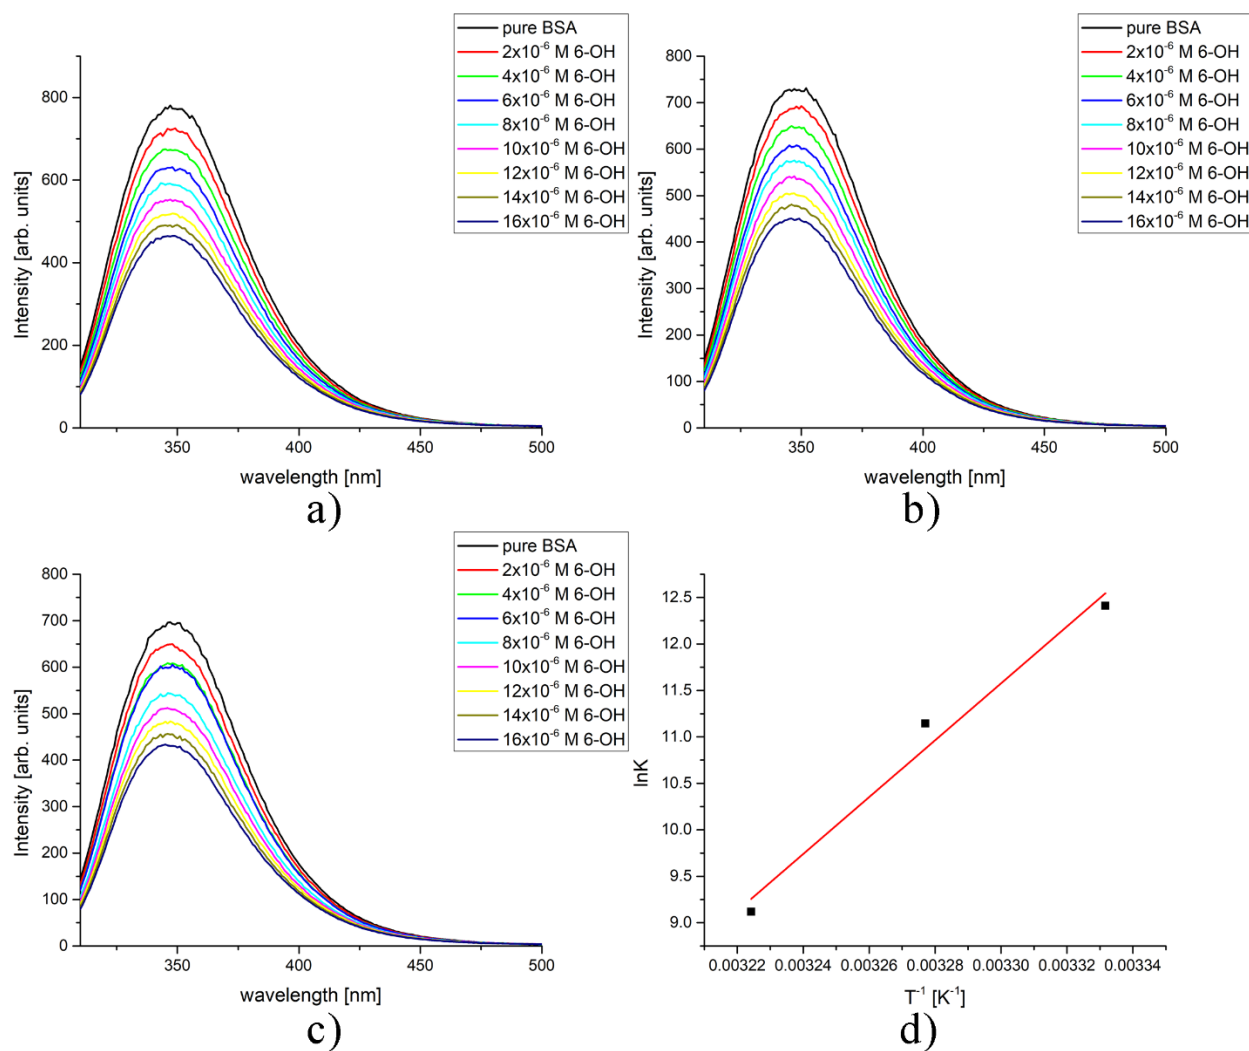

Figure S10. The BSA-binding fluorescence curves for **6-OH** at a) 27°C, b) 32°C, and c) 37°C, and d) Van't Hoff's plot for binding

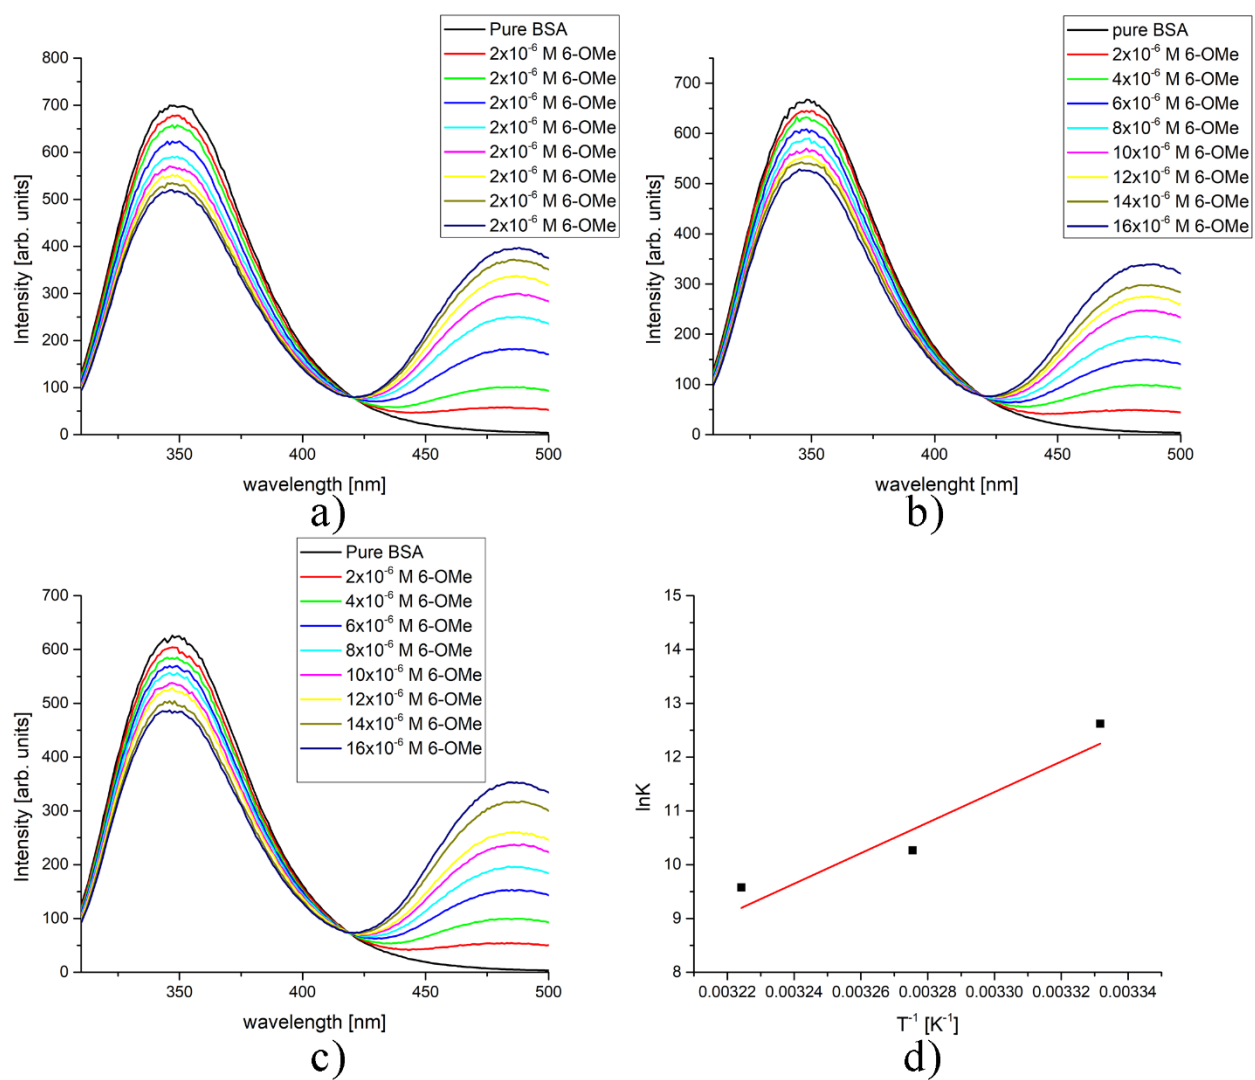

Figure S11. The BSA-binding fluorescence curves for **6-OCH<sub>3</sub>** at a) 27°C, b) 32°C, and c) 37°C, and d) Van't Hoff's plot for binding



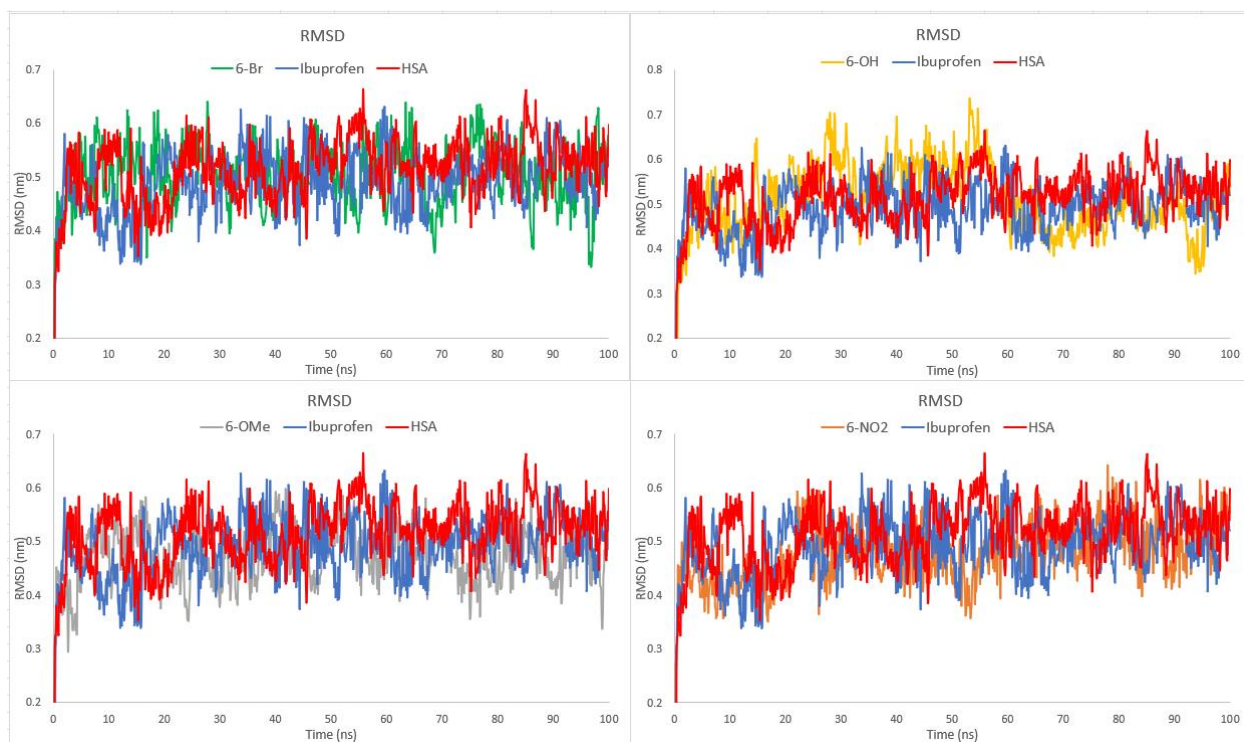

Figure S12. RMSD diagrams describing interactions of investigated compounds with HSA in comparison to ibuprofen.
